# Supplementary material
Source: PubMed Central journal article supplement (PMC3406147)
Supplement: AEM.01361-12_zam999103540so1.pdf [file AEM.01361-12_zam999103540so1.pdf]

Table S1. Complete results of TaqMan assay used to screen 24 raw milk samples for *Paenibacillus* spoilage potential

| Spoilage growth category <sup>a</sup> | Milk sample | CFU/ml after 13°C enrichment for (β-gal positive count) |           |            | Colony screening results after 13°C milk enrichment for |                          |                         |                              |            |                          |                         |                              |            |                          | Milk assessment following 21 d at 6°C                                                 |                          |                         |                              |
|---------------------------------------|-------------|---------------------------------------------------------|-----------|------------|---------------------------------------------------------|--------------------------|-------------------------|------------------------------|------------|--------------------------|-------------------------|------------------------------|------------|--------------------------|---------------------------------------------------------------------------------------|--------------------------|-------------------------|------------------------------|
|                                       |             |                                                         |           |            | T = 0 h                                                 |                          |                         | T = 24 h                     |            |                          | T = 48 h                |                              |            | Bacterial count (CFU/ml) | Predominant spoilage bacteria ( <i>rpoB</i> or 16S based identification) <sup>b</sup> |                          |                         |                              |
|                                       |             | T = 0 h                                                 | T = 24 h  | T = 48 h   | Isolate ID                                              | β-gal (+/+) <sup>c</sup> | TaqMan (C) <sup>d</sup> | <i>rpoB</i> based species ID | Isolate ID | β-gal (+/+) <sup>c</sup> | TaqMan (C) <sup>d</sup> | <i>rpoB</i> based species ID | Isolate ID |                          |                                                                                       | β-gal (+/+) <sup>c</sup> | TaqMan (C) <sup>d</sup> | <i>rpoB</i> based species ID |
| High                                  | D-3         | 2                                                       | 2         | <1         | FSL R7-644                                              | -                        | >40                     | <i>Bacillus</i>              | FSL R7-645 | -                        | >40                     | <i>Bacillus</i>              | NA         | -                        | -                                                                                     | -                        | 4.37 × 10 <sup>7</sup>  | <i>Paenibacillus</i>         |
|                                       | D-4         | 4                                                       | 15 (5)    | 153 (114)  | FSL R7-677                                              | -                        | >40                     | <i>Bacillus</i>              | FSL R7-692 | -                        | >40                     | <i>Bacillus</i>              | FSL R7-708 | +                        | 21.69                                                                                 | <i>Paenibacillus</i>     | 9.33 × 10 <sup>6</sup>  | <i>Paenibacillus</i>         |
|                                       |             |                                                         |           |            | FSL R7-678                                              | -                        | >40                     | <i>Bacillus</i>              | FSL R7-693 | +                        | 22.56                   | <i>Paenibacillus</i>         | FSL R7-709 | -                        | >40                                                                                   | <i>Bacillus</i>          |                         |                              |
|                                       |             |                                                         |           |            |                                                         |                          |                         |                              |            |                          |                         |                              | FSL R7-710 | -                        | >40                                                                                   | <i>Bacillus</i>          |                         |                              |
|                                       | C-4         | 30                                                      | 29        | 313 (13)   | FSL R7-674                                              | -                        | >40                     | <i>Bacillus</i>              | FSL R7-690 | -                        | >40                     | <i>Bacillus</i>              | FSL R7-704 | -                        | >40                                                                                   | <i>Bacillus</i>          | 5.37 × 10 <sup>6</sup>  | <i>Paenibacillus</i>         |
|                                       |             |                                                         |           |            | FSL R7-675                                              | -                        | >40                     | <i>Bacillus</i>              | FSL R7-691 | -                        | >40                     | <i>Bacillus</i>              | FSL R7-705 | -                        | >40                                                                                   | <i>Bacillus</i>          |                         |                              |
|                                       |             |                                                         |           |            | FSL R7-676                                              | -                        | >40                     | <i>Bacillus</i>              |            |                          |                         | FSL R7-706                   | +          | 25.18                    | <i>Paenibacillus</i>                                                                  |                          |                         |                              |
|                                       | C-3         | 27                                                      | 23        | 197 (40)   | FSL R7-646                                              | -                        | >40                     | <i>Bacillus</i>              | FSL R7-650 | -                        | >40                     | <i>Bacillus</i>              | FSL R7-652 | +                        | 18.9                                                                                  | <i>Paenibacillus</i>     | 2.75 × 10 <sup>6</sup>  | <i>Paenibacillus</i>         |
|                                       |             |                                                         |           |            |                                                         |                          |                         |                              |            |                          |                         |                              | FSL R7-653 | -                        | >40                                                                                   | <i>Bacillus</i>          |                         |                              |
|                                       |             |                                                         |           |            |                                                         |                          |                         |                              |            |                          |                         |                              | FSL R7-654 | -                        | >40                                                                                   | <i>Bacillus</i>          |                         |                              |
| G-4                                   | 14          | 42 (1)                                                  | 530 (190) | FSL R7-679 | -                                                       | 18.37                    | <i>Paenibacillus</i>    | FSL R7-695                   | -          | >40                      | <i>Bacillus</i>         | FSL R7-711                   | +          | 21.8                     | <i>Paenibacillus</i>                                                                  | 2.24 × 10 <sup>6</sup>   | <i>Paenibacillus</i>    |                              |
|                                       |             |                                                         |           | FSL R7-680 | -                                                       | >40                      | <i>Bacillus</i>         | FSL R7-696                   | -          | >40                      | <i>Bacillus</i>         | FSL R7-712                   | +/-        | >40                      | <i>Bacillus</i>                                                                       |                          |                         |                              |
|                                       |             |                                                         |           | FSL R7-681 | -                                                       | >40                      | <i>Bacillus</i>         | FSL R7-697                   | -          | >40                      | <i>Bacillus</i>         | FSL R7-713                   | -          | >40                      | <i>Bacillus</i>                                                                       |                          |                         |                              |
|                                       |             |                                                         |           | FSL R7-682 | -                                                       | >40                      | <i>Bacillus</i>         |                              |            |                          | FSL R7-714              | -                            | >40        | <i>Bacillus</i>          |                                                                                       |                          |                         |                              |
| Intermediate                          | C-5         | 117 (6)                                                 | 87        | 550 (10)   | FSL R7-722                                              | -                        | >40                     | <i>Bacillus</i>              | FSL R7-733 | -                        | >40                     | <i>Bacillus</i>              | FSL R7-736 | -                        | >40                                                                                   | <i>Bacillus</i>          | 6.76 × 10 <sup>6</sup>  | <i>Paenibacillus</i>         |
|                                       |             |                                                         |           |            | FSL R7-723                                              | -                        | >40                     | <i>Bacillus</i>              | FSL R7-734 | -                        | >40                     | <i>Bacillus</i>              | FSL R7-737 | -                        | >40                                                                                   | <i>Bacillus</i>          |                         |                              |
|                                       |             |                                                         |           |            | FSL R7-724                                              | -                        | >40                     | <i>Bacillus</i>              | FSL R7-735 | -                        | >40                     | <i>Bacillus</i>              | FSL R7-738 | -                        | >40                                                                                   | <i>Bacillus</i>          |                         |                              |
|                                       |             |                                                         |           |            | FSL R7-725                                              | -                        | >40                     | <i>Bacillus</i>              |            |                          |                         | FSL R7-739                   | +/-        | 18.98                    | <i>Paenibacillus</i>                                                                  |                          |                         |                              |
|                                       |             |                                                         |           |            | FSL R7-726                                              | +                        | 21.5                    | <i>Paenibacillus</i>         |            |                          |                         |                              |            |                          |                                                                                       |                          |                         |                              |
|                                       | D-5         | <1                                                      | 3         | <1         | NA                                                      |                          |                         |                              | FSL R7-740 | -                        | >40                     | <i>Bacillus</i>              | NA         |                          |                                                                                       |                          | 3.55 × 10 <sup>6</sup>  | <i>B. weihenstephanensis</i> |
|                                       |             |                                                         |           |            |                                                         |                          |                         |                              | FSL R7-741 | -                        | >40                     | <i>Bacillus</i>              |            |                          |                                                                                       |                          |                         |                              |
|                                       |             |                                                         |           |            |                                                         |                          |                         |                              | FSL R7-742 | -                        | >40                     | <i>Bacillus</i>              |            |                          |                                                                                       |                          |                         |                              |
|                                       | J-5         | <1                                                      | 12        | 686        | NA                                                      |                          |                         |                              | FSL R7-744 | -                        | >40                     | <i>Bacillus</i>              | FSL R7-745 | -                        | >40                                                                                   | <i>Bacillus</i>          | 1.95 × 10 <sup>6</sup>  | <i>B. weihenstephanensis</i> |
|                                       |             |                                                         |           |            |                                                         |                          |                         |                              |            |                          |                         |                              |            |                          |                                                                                       |                          |                         |                              |
| Low                                   | J-4         | 10                                                      | 15        | 9          | FSL R7-685                                              | -                        | >40                     | <i>Bacillus</i>              | FSL R7-699 | -                        | >40                     | <i>Bacillus</i>              | FSL R7-716 | -                        | >40                                                                                   | <i>Bacillus</i>          | 8.13 × 10 <sup>5</sup>  | NA                           |
|                                       |             |                                                         |           |            | FSL R7-686                                              | -                        | >40                     | <i>Bacillus</i>              | FSL R7-700 | -                        | >40                     | <i>Bacillus</i>              | FSL R7-717 | -                        | >40                                                                                   | <i>Bacillus</i>          |                         |                              |
|                                       |             |                                                         |           |            | FSL R7-687                                              | -                        | >40                     | <i>Bacillus</i>              | FSL R7-701 | -                        | >40                     | <i>Bacillus</i>              | FSL R7-718 | -                        | >40                                                                                   | <i>Bacillus</i>          |                         |                              |
|                                       | B-4         | 30                                                      | 44        | 2410       | FSL R7-671                                              | -                        | >40                     | <i>Bacillus</i>              | FSL R7-688 | -                        | >40                     | <i>Bacillus</i>              | FSL R7-702 | -                        | >40                                                                                   | <i>Bacillus</i>          | 8.51 × 10 <sup>5</sup>  | NA                           |
|                                       |             |                                                         |           |            | FSL R7-672                                              | -                        | >40                     | <i>Bacillus</i>              | FSL R7-689 | -                        | >40                     | <i>Bacillus</i>              | FSL R7-703 | -                        | >40                                                                                   | <i>Bacillus</i>          |                         |                              |
|                                       |             |                                                         |           |            | FSL R7-673                                              | -                        | >40                     | <i>Bacillus</i>              |            |                          |                         |                              |            |                          |                                                                                       |                          |                         |                              |
|                                       | H-4         | 3                                                       | 1         | <1         | FSL R7-683                                              | -                        | >40                     | <i>Bacillus</i>              | NA         |                          |                         | NA                           |            |                          |                                                                                       | 1.62 × 10 <sup>5</sup>   | NA                      |                              |
|                                       |             |                                                         |           |            | FSL R7-684                                              | -                        | >40                     | <i>Bacillus</i>              |            |                          |                         |                              |            |                          |                                                                                       |                          |                         |                              |
|                                       | H-5         | 6                                                       | 4         | 12 (5)     | NA                                                      |                          |                         |                              | FSL R7-746 | -                        | >40                     | <i>Bacillus</i>              | FSL R7-747 | +/-                      | 20.57                                                                                 | <i>Paenibacillus</i>     | 2.88 × 10 <sup>5</sup>  | NA                           |
|                                       |             |                                                         |           |            |                                                         |                          |                         |                              |            |                          |                         |                              | FSL R7-748 | -                        | >40                                                                                   | <i>Bacillus</i>          |                         |                              |
|                                       |             |                                                         |           |            |                                                         |                          |                         |                              |            |                          |                         | FSL R7-749                   | -          | >40                      | <i>Bacillus</i>                                                                       |                          |                         |                              |
| J-3                                   | 6           | 5                                                       | 937       | FSL R7-637 | -                                                       | >40                      | <i>Bacillus</i>         | FSL R7-639                   | -          | >40                      | <i>Bacillus</i>         | FSL R7-642                   | -          | >40                      | <i>Bacillus</i>                                                                       | 2.45 × 10 <sup>5</sup>   | NA                      |                              |
|                                       |             |                                                         |           | FSL R7-638 | -                                                       | >40                      | <i>Bacillus</i>         | FSL R7-640                   | -          | >40                      | <i>Bacillus</i>         | FSL R7-643                   | -          | >40                      | <i>Bacillus</i>                                                                       |                          |                         |                              |
| A-4                                   | 3           | 2                                                       | 3         | FSL R7-662 | -                                                       | >40                      | <i>Bacillus</i>         | FSL R7-664                   | -          | >40                      | <i>Bacillus</i>         | FSL R7-666                   | -          | >40                      | <i>Bacillus</i>                                                                       | 2.04 × 10 <sup>5</sup>   | NA                      |                              |
|                                       |             |                                                         |           | FSL R7-663 | -                                                       | >40                      | <i>Bacillus</i>         | FSL R7-665                   | -          | >40                      | <i>Bacillus</i>         | FSL R7-667                   | -          | >40                      | <i>Bacillus</i>                                                                       |                          |                         |                              |
| E-5                                   | 1           | <1                                                      | <1        | FSL R7-743 | -                                                       | >40                      | <i>Bacillus</i>         | NA                           |            |                          | NA                      |                              |            |                          | 1.41 × 10 <sup>5</sup>                                                                | NA                       |                         |                              |
| F-5                                   | <1          | 29                                                      | 1017      | FSL R7-719 | -                                                       | >40                      | <i>Brevibacillus</i>    | FSL R7-720                   | -          | >40                      | <i>Brevibacillus</i>    | FSL R7-732                   | -          | >40                      | <i>Bacillus</i>                                                                       | 1.41 × 10 <sup>5</sup>   | NA                      |                              |
| E-3                                   | 1           | 1                                                       | <1        | FSL R7-635 | -                                                       | >40                      | <i>Oceanobacillus</i>   | FSL R7-636                   | -          | >40                      | <i>Bacillus</i>         | NA                           |            |                          |                                                                                       | <1.00 × 10 <sup>5</sup>  | NA                      |                              |
| F-3                                   | <1          | <1                                                      | 577       | NA         |                                                         |                          |                         | NA                           |            |                          | FSL R7-657              | -                            | >40        | <i>Bacillus</i>          | <1.00 × 10 <sup>5</sup>                                                               | NA                       |                         |                              |
| H-3                                   | 2           | <1                                                      | <1        | FSL R7-659 | -                                                       | >40                      | <i>Bacillus</i>         | NA                           |            |                          | NA                      |                              |            |                          |                                                                                       | <1.00 × 10 <sup>5</sup>  | NA                      |                              |
|                                       |             |                                                         |           | FSL R7-660 | -                                                       | >40                      | <i>Bacillus</i>         |                              |            |                          |                         |                              |            |                          |                                                                                       |                          |                         |                              |
| I-3                                   | 1           | <1                                                      | <1        | FSL R7-661 | -                                                       | >40                      | <i>Bacillus</i>         | NA                           |            |                          | NA                      |                              |            |                          | <1.00 × 10 <sup>5</sup>                                                               | NA                       |                         |                              |
| E-4                                   | <1          | 2                                                       | <1        | NA         |                                                         |                          |                         | FSL R7-694                   | -          | >40                      | <i>Bacillus</i>         | NA                           |            |                          |                                                                                       | <1.00 × 10 <sup>5</sup>  | NA                      |                              |
| F-4                                   | <1          | 1                                                       | 16        | FSL R7-668 | -                                                       | >40                      | <i>Bacillus</i>         | FSL R7-669                   | -          | >40                      | <i>Bacillus</i>         | FSL R7-670                   | -          | >40                      | <i>Bacillus</i>                                                                       | <1.00 × 10 <sup>5</sup>  | NA                      |                              |
| I-4                                   | <1          | 8                                                       | 5700      | NA         |                                                         |                          |                         | FSL R7-698                   | -          | >40                      | <i>Bacillus</i>         | FSL R7-715                   | -          | >40                      | <i>Bacillus</i>                                                                       | <1.00 × 10 <sup>5</sup>  | NA                      |                              |
| I-5                                   | 4           | <1                                                      | <1        | FSL R7-750 | -                                                       | >40                      | <i>Staphylococcus</i>   | NA                           |            |                          | NA                      |                              |            |                          | <1.00 × 10 <sup>5</sup>                                                               | NA                       |                         |                              |

<sup>a</sup>Growth category assigned based on APCs following heat shock and storage of milk at 6°C for 21 d. <sup>b</sup>High category indicates APC > 1 × 10<sup>6</sup> CFU/ml; <sup>c</sup>Intermediate category indicates APC ≤ 1 × 10<sup>6</sup> CFU/ml and > 2 × 10<sup>5</sup> CFU/ml; <sup>d</sup>Low category indicates APC ≤ 2 × 10<sup>5</sup> CFU/ml.

<sup>e</sup>β-gal positive (blue) colonies represented by "+"; β-gal negative colonies represented by "-"; and β-gal weakly positive colonies (partial blue or light blue) indicated by "+/-."

<sup>f</sup>Predominant spoilage bacteria not identified in milk samples where the bacterial count remained ≤ 2 × 10<sup>6</sup> CFU/ml or when no bacterial colonies could be isolated; indicated by NA.

<sup>g</sup>TaqMan C<sub>v</sub> values < 36.71 interpreted as a positive *Paenibacillus* colony.
